# Supplementary material for: Second-harmonic generation using [image]-quasi-phasematching in a GaAs whispering-gallery-mode microcavity
Source: PubMed Central journal article supplement — Nat Commun. 2014 Jan 17;5:3109. doi: 10.1038/ncomms4109 (PMC3905730; doi:10.1038/ncomms4109), 2014-01-17
Supplement: ncomms4109-s1.pdf [file ncomms4109-s1.pdf]

## Supplementary Information

### Supplementary Figure 1

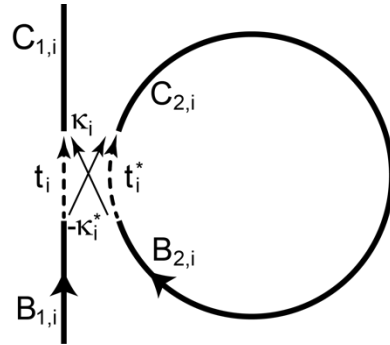

**Supplementary Figure 1** Diagram of coupling between a ring resonator and a waveguide.  $t_i$  and  $\kappa_i$  are the through- and cross-coupling coefficients, respectively.  $i$  represents f or SH.  $B_{n,i}$  and  $C_{n,i}$  are the mode amplitudes.

## Supplementary Table

**Supplementary Table 1.** Microdisk quality factors and associated loss and transmission coefficients at fundamental and SH wavelengths.

|             | $Q_i^0$ | $Q_i^{tot}$ | $Q_i^c$ | $1 - \alpha_i$       | $1 -  t_i $          |
|-------------|---------|-------------|---------|----------------------|----------------------|
| Fundamental | 33000   | 16000       | 31000   | $2.2 \times 10^{-3}$ | $2.4 \times 10^{-3}$ |
| SH          | 9000    | 4000        | 7200    | $2.9 \times 10^{-2}$ | $3.6 \times 10^{-2}$ |

## Supplementary Discussion

Equation (1) in the main text,

$$\frac{dA_{\text{SH}}}{d\theta} = A_f^2 (K_+ e^{i(\Delta m+2)\theta} + K_- e^{i(\Delta m-2)\theta}), \quad (\text{S1})$$

describes second-harmonic generation (SHG) in a cylindrically symmetric, nonlinear-optical microdisk made of a material from the  $\bar{4}3m$  crystal class. The equation is derived<sup>11</sup> by considering the projection of the  $\chi^{(2)}$  nonlinear susceptibility tensor for these crystals in the cylindrical propagation geometry, which we summarize here. The nonlinear interaction is governed by the wave equation with a nonlinear-optical driving polarization,  $\mathbf{P}^{\text{NL}}$

$$\nabla^2 \mathbf{E} - \mu \varepsilon \frac{\partial^2 \mathbf{E}}{\partial t^2} = \mu_0 \frac{\partial^2 \mathbf{P}^{\text{NL}}}{\partial t^2}. \quad (\text{S2})$$

Consider the  $\hat{z}$ -component of the second-harmonic (SH) field. In cylindrical coordinates utilizing the slowing varying envelope approximation, Eq. (S2) can be approximated as

$$2im_{\text{SH}} \frac{\partial E_{\text{SH},z}}{\partial \theta} = \mu_0 \omega_{\text{SH}}^2 P_{\text{SH},z}^{\text{NL}} \exp(-i\Delta m\theta) \quad (\text{S3})$$

where  $\Delta m = m_{\text{SH}} - 2m_f$ . In GaAs and other  $\bar{4}3m$  point-group symmetry crystals, there is only one non-zero  $\chi^{(2)}$  tensor element:  $d_{xyz} = d_{14} = d_{25} = d_{36}$ , so that

$$P_{\text{SH},z}^{\text{NL}} = 2\varepsilon_0 d_{14} E_{f,x} E_{f,y}. \quad (\text{S4})$$

In terms of  $E_{f,r}$  and  $E_{f,\theta}$ ,

$$\begin{aligned} E_{f,x} &= E_{f,r} \cos\theta - E_{f,\theta} \sin\theta \\ E_{f,y} &= E_{f,r} \sin\theta + E_{f,\theta} \cos\theta \\ P_{\text{SH},z}^{\text{NL}} &= 2\varepsilon_0 d_{14} \left\{ E_{f,r} E_{f,\theta} \cos 2\theta + \frac{1}{2} (E_{f,r}^2 - E_{f,\theta}^2) \sin 2\theta \right\} \end{aligned} \quad (\text{S5})$$

Combining Eqs. (S3) through (S5), we obtain

$$\frac{\partial E_{\text{SH},z}}{\partial \theta} = \frac{-i\mu_0 \varepsilon_0 d_{14} \omega_{\text{SH}}^2}{m_{\text{SH}}} \left\{ e^{-i(\Delta m - 2)} \left[ E_{t,r} E_{t,\theta} - \frac{i}{2} (E_{t,r}^2 - E_{t,\theta}^2) \right] + e^{-i(\Delta m + 2)} \left[ E_{t,r} E_{t,\theta} + \frac{i}{2} (E_{t,r}^2 - E_{t,\theta}^2) \right] \right\}. \quad (\text{S6})$$

The cylindrical propagation geometry together with the crystal symmetry produce quasi-phasematched frequency conversion when  $\Delta m = +2$  or  $-2$ .

To calculate the nonlinear coupling coefficients,  $K_+$  and  $K_-$  in Eq. (S1), a more careful analysis is needed. For a general three-frequency  $\chi^{(2)}$  process inside a  $\hat{z}$ -surface-normal microdisk, the  $d_{xyz}$  tensor element requires one TM-polarized wave to interact with two TE-polarized waves; for SHG, the fundamental wave is TE-polarized ( $H_{t,z}, E_{t,r}, E_{t,\theta}$ ) while the SH wave is TM-polarized ( $E_{\text{SH},z}, H_{\text{SH},r}, H_{\text{SH},\theta}$ ).  $H_{t,z}$  and  $E_{\text{SH},z}$  are separable functions that can be written as

$$F_{i,z}(r, \theta, z) \exp(i\omega_i t) = A_i(\theta) \tilde{\psi}_i(r) \tilde{Z}_i(z) \exp[i(\omega_i t - m_i \theta)], \quad (\text{S7})$$

where  $F_{i,z} = H_{t,z}$  or  $E_{\text{SH},z}$ , and the normalization is chosen such that  $|A_i(\theta)|^2$  represents the circulating power. The  $\hat{r}$  and  $\hat{\theta}$  components of the waves may be calculated from the  $\hat{z}$  components by

$$\begin{aligned} \text{TM} &= \{E_z, H_r, H_\theta\} & \text{TE} &= \{H_z, E_r, E_\theta\} \\ H_r &= \frac{m}{r\mu_0\omega} E_z & E_r &= -\frac{m}{r\varepsilon_0 n^2 \omega} H_z, \\ H_\theta &= \frac{1}{i\mu_0\omega} \frac{\partial E_z}{\partial r} & E_\theta &= \frac{i}{\varepsilon_0 n^2 \omega} \frac{\partial H_z}{\partial r} \end{aligned} \quad (\text{S8})$$

where  $\mu_0$  and  $\varepsilon_0$  are the vacuum permeability and permittivity, respectively;  $c$  is the speed of light and  $n$  is the refractive index.

Considering the  $\hat{z}$  component of the wave equation (Eq. (S2)), one can expand  $E_{\text{SH},z}$  in terms of the eigenmodes of the microdisk. If we focus on one particular SH

resonance characterized by integers  $(m_{\text{SH}}, p_{\text{SH}}, q_{\text{SH}})$  that are the azimuthal, radial and vertical indices, respectively, then the nonlinear coupling is calculated from the overlap integral between this SH eigenmode and  $P_{\text{SH},z}^{\text{NL}}$ , which is a function of the fundamental wave that we assume is also on-resonance. For a SH eigenmode characterized by  $E_{\text{SH},z} = A_{m_{\text{SH}}p_{\text{SH}}q_{\text{SH}}}(\theta)\tilde{\psi}_{p_{\text{SH}}}(r)\tilde{Z}_{q_{\text{SH}}}(z)\exp[-im_{\text{SH}}\theta]$  and a fundamental eigenmode characterized by  $H_{f,z} = A_{m_f p_f q_f}(\theta)\tilde{\psi}_{p_f}(r)\tilde{Z}_{q_f}(z)\exp[-im_f\theta]$ , the result of using  $P_{\text{SH},z}^{\text{NL}}$  in Eq. (S5) with  $E_{f,r}$  and  $E_{f,r\theta}$  calculated from Eq. (S8), applying the slowly varying envelope approximation, and performing the overlap integral is<sup>11</sup>

$$\frac{\partial A_{m_{\text{SH}}p_{\text{SH}}q_{\text{SH}}}}{\partial \theta} = \frac{-d_{14}}{2\varepsilon_0\omega_{\text{SH}}}\left(\frac{A_{m_f p_f q_f}}{n_f^2}\right)^2 \int_{-h/2}^{h/2} \tilde{Z}_{q_{\text{SH}}}(z)\tilde{Z}_{q_f}^2(z)dz \times \left[ \int_0^R e^{i(\Delta m+2)\theta} r \tilde{\psi}_{\text{SH}} \left( \frac{m_f}{r} \tilde{\psi}_f + \frac{\partial \tilde{\psi}_f}{\partial r} \right)^2 dr - \int_0^R e^{i(\Delta m-2)\theta} r \tilde{\psi}_{\text{SH}} \left( \frac{m_f}{r} \tilde{\psi}_f - \frac{\partial \tilde{\psi}_f}{\partial r} \right)^2 dr \right], \quad (\text{S9})$$

where  $R$  and  $h$  are the radius and height of the microdisk, respectively. Comparing Eq. (S9) to Eq. (S1), we identify

$$K_+ = -\frac{d_{14}}{2\varepsilon_0\omega_{\text{SH}}n_f^4} \int_{-h/2}^{h/2} \tilde{Z}_{q_{\text{SH}}}(z)\tilde{Z}_{q_f}^2(z)dz \int_0^R r \tilde{\psi}_{\text{SH}} \left( \frac{m_f}{r} \tilde{\psi}_f + \frac{\partial \tilde{\psi}_f}{\partial r} \right)^2 dr$$

$$K_- = \frac{d_{14}}{2\varepsilon_0\omega_{\text{SH}}n_f^4} \int_{-h/2}^{h/2} \tilde{Z}_{q_{\text{SH}}}(z)\tilde{Z}_{q_f}^2(z)dz \int_0^R r \tilde{\psi}_{\text{SH}} \left( \frac{m_f}{r} \tilde{\psi}_f - \frac{\partial \tilde{\psi}_f}{\partial r} \right)^2 dr. \quad (\text{S10})$$

For second-harmonic generation in a 2.6- $\mu\text{m}$  radius and 160-nm thickness GaAs microdisk between a TE-polarized fundamental ( $m_f=13$ ,  $p_f=1$ ,  $q_f=1$ ) and TM-polarized second harmonic ( $m_{\text{SH}}=24$ ,  $p_{\text{SH}}=2$ ,  $q_{\text{SH}}=1$ ), we calculate  $K_+ = 1.6 \times 10^{-3} \text{ W}^{-1/2}$  and  $K_- = -1.0 \times 10^{-5} \text{ W}^{-1/2}$ , where  $\lambda_f = 1.99 \mu\text{m}$ ,  $n_f = 3.34$ , and  $d_{14} = 94 \text{ pm/V}$ <sup>27</sup>.

The coupling of a waveguide to a ring resonator can be described by the sketch in Fig. S1.  $B_{n,i}$  and  $C_{n,i}$  are the complex mode amplitudes normalized such that  $|B_{n,i}|^2$ ,  $|C_{n,i}|^2$  = power. In the absence of reflections, coupling between the resonator and waveguide is described by<sup>36</sup>

$$\begin{bmatrix} C_{1,i} \\ C_{2,i} \end{bmatrix} = \begin{bmatrix} t_i & \kappa_i \\ -\kappa_i^* & t_i^* \end{bmatrix} \begin{bmatrix} B_{1,i} \\ B_{2,i} \end{bmatrix}. \quad (\text{S11})$$

The coupler is taken to be lossless so that  $|\kappa_i|^2 + |t_i|^2 = 1$ . At the fundamental wave,

$$B_{2,f} = \alpha_f \exp(i\phi_f) C_{2,f}, \quad (\text{S12})$$

where  $\alpha_f$  is the resonator loss, and  $\phi_f$  is the phase accumulated by propagation around the resonator. At the SH wave, there is loss ( $\alpha_{\text{SH}}$ ), phase shift ( $\phi_{\text{SH}}$ ) and SHG gain. By integrating Eq. (S1) from  $\theta = 0$  to  $2\pi$ , we find that each round trip in the microdisk produces an increase in the SH amplitude

$$\begin{aligned} A_{\text{SH}}(2\pi) - A_{\text{SH}}(0) &= 2\pi A_f^2 (K_+ e^{i(\Delta m + 2)\pi} \text{sinc}[(\Delta m + 2)\pi] + K_- e^{i(\Delta m - 2)\pi} \text{sinc}[(\Delta m - 2)\pi]) \\ &= A_f^2 \tilde{K} \end{aligned} \quad (\text{S13})$$

where  $\text{sinc}(x) = \sin(x)/x$  and  $A_f \approx$  constant. Combining Eq. (S13) with phase shift and loss, we obtain

$$\frac{B_{2,\text{SH}}}{\alpha_{\text{SH}} \exp(i\phi_{\text{SH}})} - C_{2,\text{SH}} = |C_{2,f}|^2 \tilde{K}. \quad (\text{S14})$$

Equations (S11) and (S12) imply that the circulating power is

$$|B_{2,f}|^2 = \frac{\alpha_f^2 (1 - |t_f|^2)}{1 + \alpha_f^2 |t_f|^2 - 2\alpha_f |t_f| \cos(\psi_f + \phi_f)} |B_{1,f}|^2, \quad (\text{S15})$$

where  $t_f = |t_f| \exp(-i\psi_f)$ . Note that Eq. (S15) also describes the circulating-power spectrum of a “passive” resonator in the SH wavelength range.

Combining Eqs. (S11) and (S14) with  $B_{1,\text{SH}} = 0$ , we find

$$\begin{aligned}
|C_{1,\text{SH}}|^2 &= (1 - |t_{\text{SH}}|^2) |B_{2,\text{SH}}|^2 \\
&= |B_{2,\text{f}}|^4 \frac{(1 - |t_{\text{SH}}|^2) |\tilde{K}|^2 \alpha_{\text{SH}}^2}{1 + \alpha_{\text{SH}}^2 |t_{\text{SH}}|^2 - 2\alpha_{\text{SH}} |t_{\text{SH}}| \cos(\psi_{\text{SH}} + \varphi_{\text{SH}})} \\
&= |B_{1,\text{f}}|^4 \frac{(1 - |t_{\text{SH}}|^2) |\tilde{K}|^2 \alpha_{\text{SH}}^2}{1 + \alpha_{\text{SH}}^2 |t_{\text{SH}}|^2 - 2\alpha_{\text{SH}} |t_{\text{SH}}| \cos(\psi_{\text{SH}} + \varphi_{\text{SH}})} \\
&\quad \times \left( \frac{\alpha_{\text{f}}^2 (1 - |t_{\text{f}}|^2)}{1 + \alpha_{\text{f}}^2 |t_{\text{f}}|^2 - 2\alpha_{\text{f}} |t_{\text{f}}| \cos(\psi_{\text{f}} + \varphi_{\text{f}})} \right)^2.
\end{aligned} \tag{S16}$$

$|B_{2,\text{f}}|^2$  and  $|B_{2,\text{SH}}|^2$  are the circulating powers at the fundamental and SH, respectively, while  $|C_{1,\text{f}}|^2$  and  $|C_{1,\text{SH}}|^2$  are the output powers. Comparison of Eqs. (S16) to (S15) yields Eq. (3) in the main text.

The phase shifts ( $\varphi_{\text{f}}$  and  $\varphi_{\text{SH}}$ ) are related to the azimuthal numbers  $m_i$  of the resonances.  $m_i$  plays a role analogous to the wavevector  $k_i$  in linear propagation geometries; both describe the rate of phase accumulation due to propagation. Even though  $m_i$  is only well-defined at resonant wavelengths, we can estimate an effective  $m_i'(\lambda_j)$  for all wavelengths inside the microdisk by interpolating between resonances of the same spatial-mode family. The continuous function  $m_i'(\lambda_j)$  allows us to calculate  $\varphi_i$  for all wavelengths, both on- and off-resonance with the cavity. The phase mismatch accumulated per round trip is then

$$-2\pi\Delta m' = \varphi_{\text{SH}} - 2\varphi_{\text{f}}, \tag{S17}$$

so  $\tilde{K}$  defined in Eq. (S12) is a function of  $\varphi_{\text{f}}$  and  $\varphi_{\text{SH}}$ . The loss,  $\alpha_i$ , and transmission coefficient,  $|t_i|$ , can be calculated from the intrinsic  $Q_i^0$  and coupling  $Q_i^c$  quality factors by<sup>11,36</sup>

$$Q_i^0 = \pi \frac{\sqrt{\alpha_i}}{1 - \alpha_i} \frac{c}{\lambda_i \delta f_{i,\text{FSR}}}, \quad Q_i^c = \pi \frac{\sqrt{|t_i|}}{1 - |t_i|} \frac{c}{\lambda_i \delta f_{i,\text{FSR}}}, \tag{S18}$$

where  $\delta f_{i,FSR}$  is the free spectral range of the resonator for wave  $i$  in frequency units.

For the resonant modes of the GaAs microdisk considered here,  $\delta f_{f,FSR} = 6.4 \times 10^{12}$  Hz and  $\delta f_{SH,FSR} = 3.6 \times 10^{12}$  Hz. The measured quality factors are summarized in Table S1, as are the calculated loss and transmission coefficients (Eq. (S18)) at both wavelengths. Using finite-element modeling, we calculate the wavelengths for several adjacent resonances near the fundamental ( $m_f=13$ ,  $p_f=1$ ,  $q_f=1$ ) and second harmonic ( $m_{SH}=24$ ,  $p_{SH}=2$ ,  $q_{SH}=1$ ) resonances in order to construct  $m'_i(\lambda_j)$ . We then used Eq. (S16) and  $\phi_i = -2\pi m'_i(\lambda_j)$  to calculate the round-trip phases. Using values for the loss and transmission coefficients in Table S1,  $K_+ = 1.6 \times 10^{-3} \text{ W}^{-1/2}$  and  $K_- = -1.0 \times 10^{-5} \text{ W}^{-1/2}$  calculated earlier, and taking  $\psi_f = \psi_{SH} = 0$ , Eq. (S16) predicts peak, normalized conversion efficiency  $\eta = |C_{1,SH}|^2 / |B_{1,f}|^4 = 1 \times 10^{-3} / \text{mW}$  for a microdisk with  $||\lambda_f^{\text{res}} - 2\lambda_{SH}^{\text{res}}|| = 2.2 \text{ nm}$ . By decreasing the theoretical microdisk radius by 9 nm,  $|\lambda_f^{\text{res}} - 2\lambda_{SH}^{\text{res}}| = 0 \text{ nm}$  and the theoretical peak, normalized conversion efficiency increases to  $\eta = 8 \times 10^{-2} / \text{mW}$ . We note that the GaAs microdisk described here may also support  $\bar{4}$ -QPM between the fundamental ( $m_f=13$ ,  $p_f=1$ ,  $q_f=1$ ) resonance and the second harmonic ( $m_{SH}=28$ ,  $p_{SH}=1$ ,  $q_{SH}=1$ ) resonance ( $\Delta m = +2$ ). As calculated in Ref. 11, the nonlinear coupling coefficients for these modes are  $K_+ = 9.7 \times 10^{-4} \text{ W}^{-1/2}$  and  $K_- = -1.9 \times 10^{-3} \text{ W}^{-1/2}$ . If  $|\lambda_f^{\text{res}} - 2\lambda_{SH}^{\text{res}}| = 0 \text{ nm}$  for the resonances satisfying  $\Delta m = +2$ , then the normalized conversion efficiency would be  $\eta = 1.2 \times 10^{-1} / \text{mW}$ .



## Supplementary Reference

34. Yariv, A. Universal relations for coupling of optical power between microresonators and dielectric waveguides. *Electron. Lett.* **36**, 321–322 (2000).
